# Supplementary material
Source: publisher figshare collection journal article supplement (https://frontiersin.figshare.com/ndownloader/files/22530521)

Improved Environmental DNA Reference Library Detects Overlooked Extralimital Marine  
Fishes in New Jersey, USA

Stoeckle MY, Das Mishu M, Charlop-Powers.

**Supplementary Material**

Supplementary File 1. Modified Qiagen PowerSoil DNA extraction protocol.

Supplementary Figure 1. DNA yield vs extraction interval.

Supplementary Figure 2. DNA yield by site, date.

Supplementary Figure 3. *Rhinoptera bonasus*, *R. brasiliensis* COI barcodes from GenBank, this study.

Supplementary Figure 4. Maximum reads/species vs. detections.

**Supplementary File 1.** Modified Qiagen PowerSoil protocol.

1.     -Tissue: Add 100  $\mu$ l C1 solution to PowerBead tube.  
       -Filter: Add 180  $\mu$ l C1 solution to PowerBead tube.
2.     -Tissue: Place tissue fragment (not larger than 4 mm<sup>3</sup>) in PowerBead tube.  
       -Filter: Using a single-edge razor and plastic petri dish as a cutting surface, fold filter in half, keeping residue surface inside, and trim off the outer circumferential portion that was not exposed to the filtrate. Then cut into pieces approximately 2-3 mm x 10 mm. Place cut-up filter into PowerBead tube with forceps. Between filters, rinse razor, forceps, and gloves thoroughly with tap water and dry completely with paper towel. Use a new petri dish for each filter.
3. Place on vortexer platform on high for 20 min. Watch that device does not fall off bench.
4. Centrifuge at 10,000g for 1 min.
5. Using a P200 set at 155  $\mu$ l, transfer 3 aliquots of supernatant (total volume 465  $\mu$ l) from PowerBead tube to a 2 ml Collection Tube. You can stick pipette tip down deeply along the tube wall, as beads and filter fragments are too large to go into pipette.
6. Add 100  $\mu$ l of Solution C2 and 100  $\mu$ l of Solution C3. Vortex 10 seconds.
7. Incubate at 4°C for 5 min (put rack in refrigerator/cold room).
8. Centrifuge at room temp 1 min at 10,000g.
9. Transfer 625  $\mu$ l supernatant to a new 2 ml Collection Tube.
10. Add 1 ml Solution C4 to the supernatant. Invert 20 times to mix.
11.     -Load 675  $\mu$ l onto a Spin Filter and centrifuge at 10,000g for 1 min at room temp.  
       -Discard flow through.  
       -Add another 675  $\mu$ l to Spin Filter and centrifuge at 10,000g for 1 min.  
       -Discard flow through.  
       -Load the remaining supernatant onto Spin Filter and centrifuge at 10,000g for 1 min.  
       -Discard flow through.
12. Add 500  $\mu$ l Solution C5 to Spin Filter and centrifuge for 30 secs at 10,000g. Discard flow through.
13. Centrifuge for 1 min at 10,000g.
14. Place Spin Filter in a clean 2 ml Collection Tube.
15. Add 100  $\mu$ l Solution C6 to the center of the white filter (don't touch filter with pipette tip).
16. Centrifuge for 30 secs at 10,000g. Usually recover ~95  $\mu$ l. Store at -20°C.

**Supplementary Figure 1.** DNA yield vs. filter storage interval.

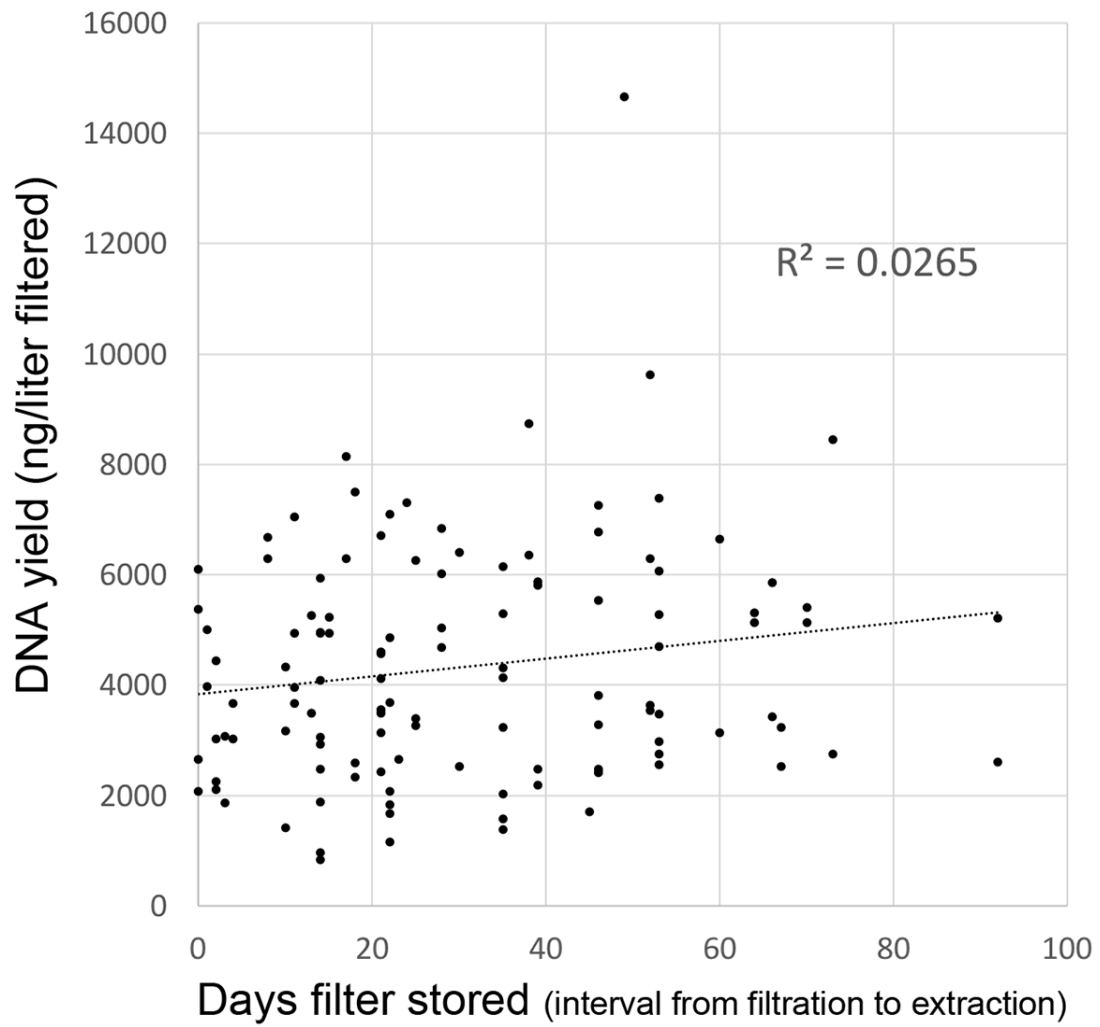

**Supplementary Figure 2.** DNA yield from field samples by date collected.

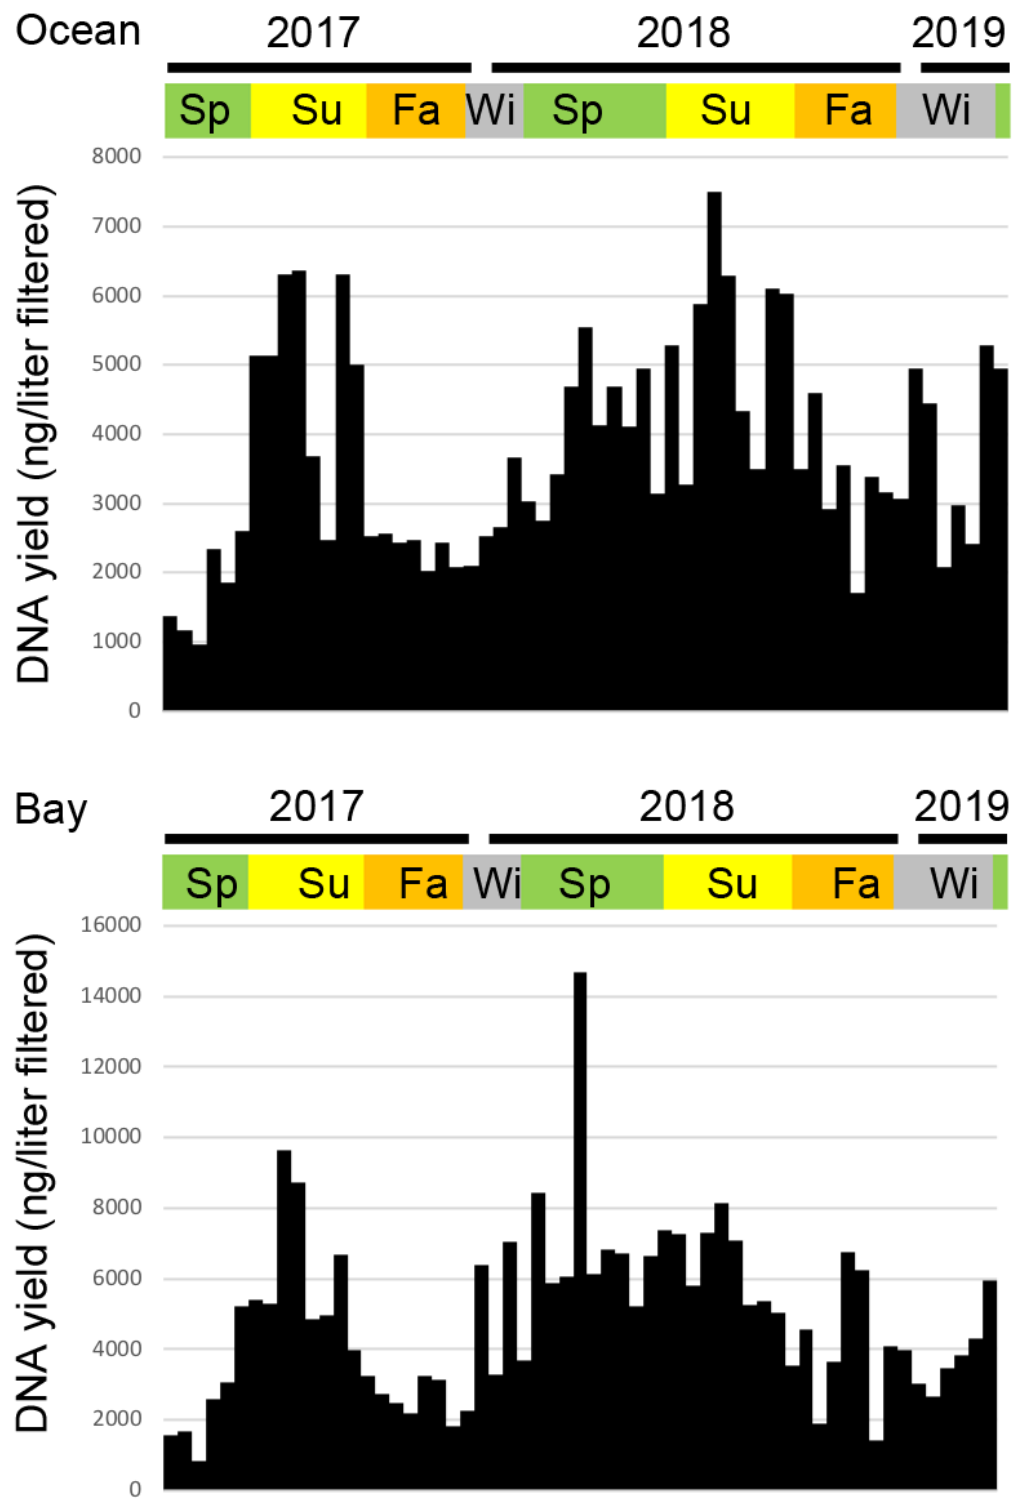

**Supplementary Figure 3.** Comparison of *Rhinoptera brasiliensis* sequences obtained in this study (highlighted in blue) with *R. brasiliensis* and *R. bonasus* COI barcodes obtained from GenBank. Conserved sites not shown. Colors indicate nucleotides that differ from consensus (A=green, C=blue, G=black, T=red).

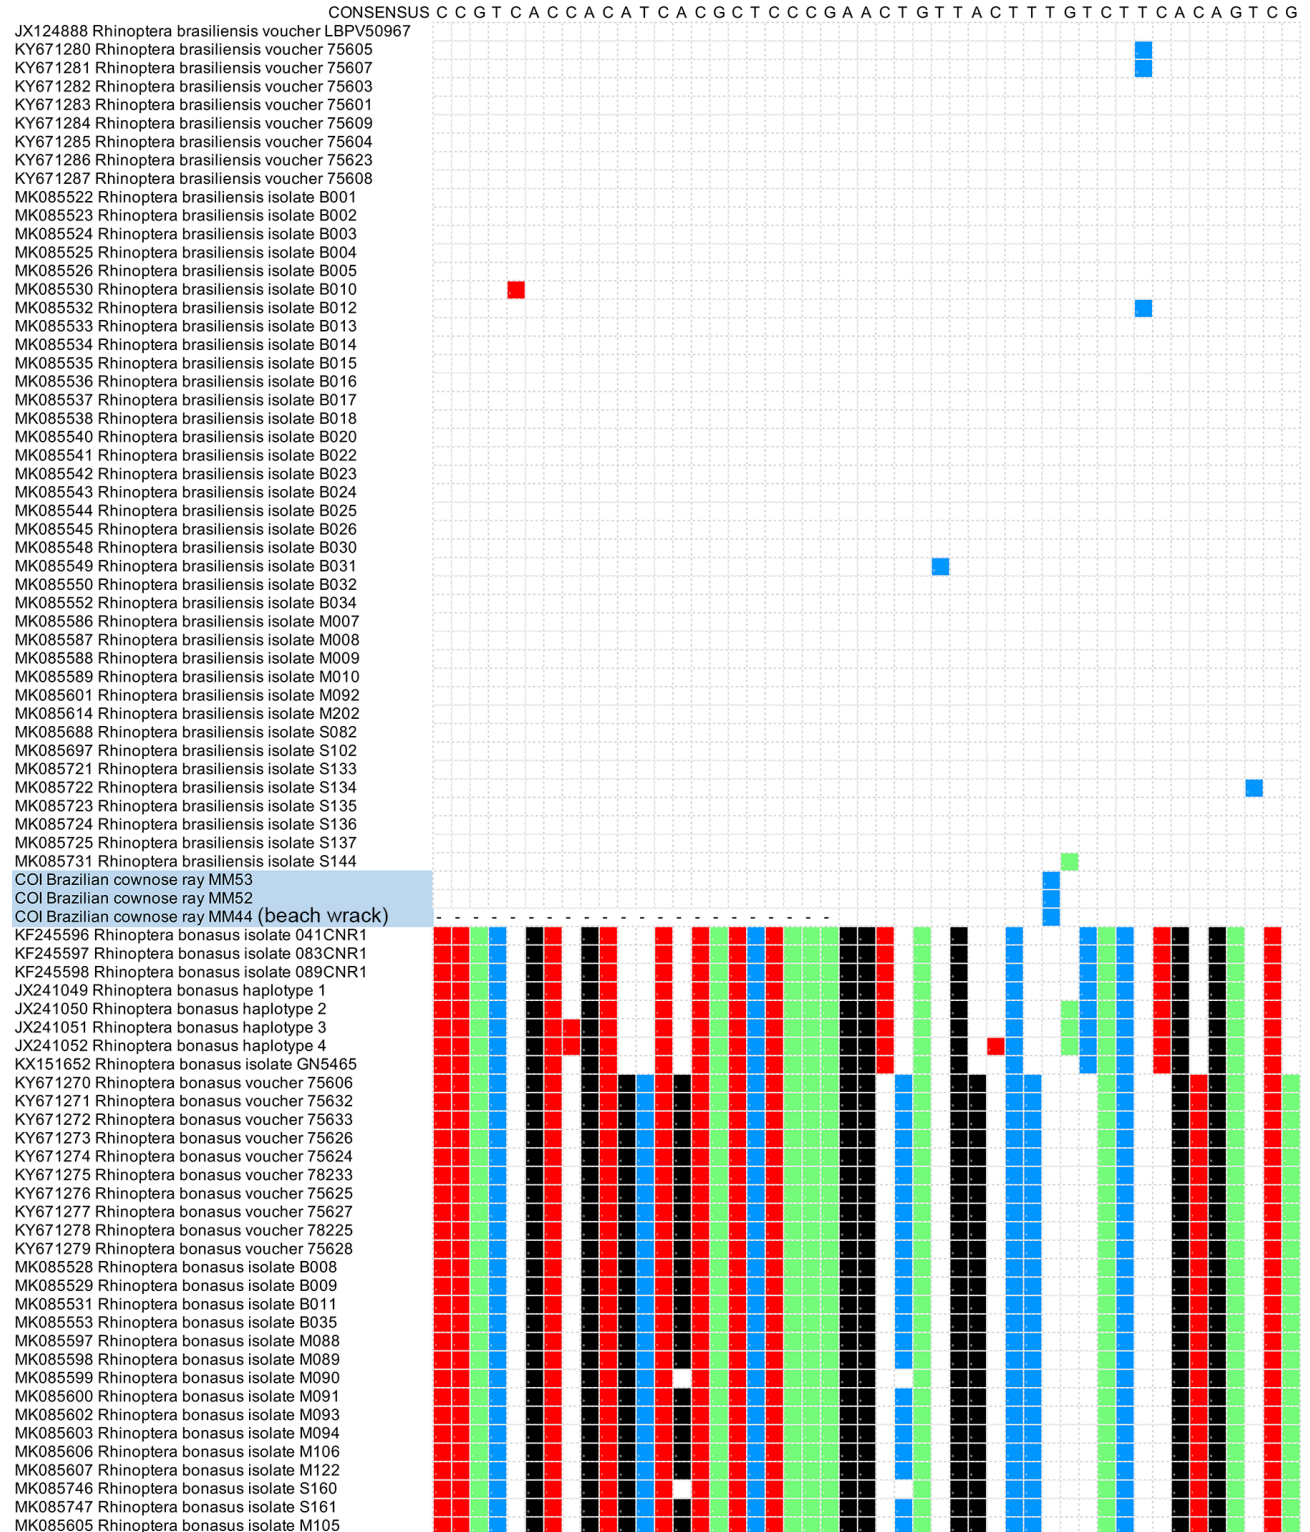

**Supplementary Figure 4.** Maximum reads vs. detections for each species. The apparent dynamic range, i.e., the fold-difference between the lowest read number from single-detection species (shown in red) and the highest read number from more common species (shown in blue), is indicated at right of each graph. For single-detection species, maximum and minimum reads are the same.

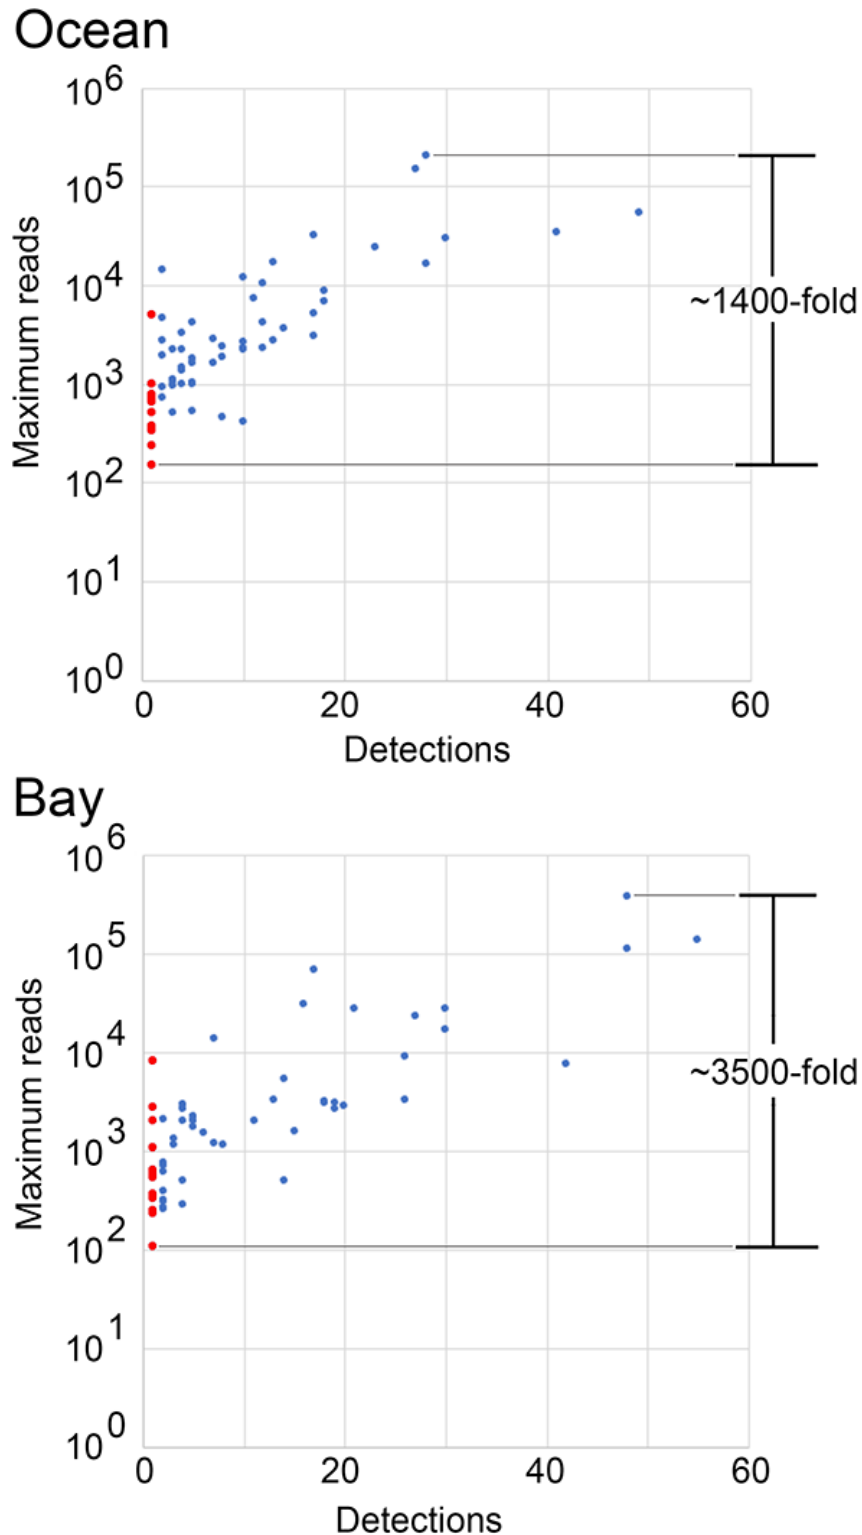

Supplement: Supplementary file 1 [file 22530521]
